# Supplementary material for: Putative fishery-induced changes in biomass and population size structures of demersal deep-sea fishes in ICES Sub-area VII, Northeast Atlantic Ocean
Source: Copernicus journal article supplement (doi:10.5194/bg-10-529-2013), 2013-01-25
Supplement: Supplementary file 1 [file bg-10-529-2013-supplement.pdf]

Supplement: Length-weight equations used to determine individual fish biomass for fish species caught in the early period (1977-1989). N = number of individuals used to determine the length-weight relationship for each species.

| Species                                                    | Length-weight equation                   | n   | Source               | Study area and Notes                                     |
|------------------------------------------------------------|------------------------------------------|-----|----------------------|----------------------------------------------------------|
| <i>Alepocephalus agassizii</i>                             | $TW(g) = 0.0035 \times (SLcm)^{3.2914}$  | 11  | PSB trawl data       | NE Atlantic                                              |
| <i>Alepocephalus australis</i>                             | $TW(g) = 0.003 \times (SLcm)^{3.3582}$   | 3   | John Gordon          | NE Atlantic                                              |
| <i>Alepocephalus bairdii</i>                               | $TW(g) = 0.0055 \times (SLcm)^{3.1403}$  | 38  | PSB trawl data       | NE Atlantic                                              |
| <i>Alepocephalus productus</i>                             | $TW(g) = 0.0047 \times (SLcm)^{3.2293}$  | 5   | PSB trawl data       | NE Atlantic                                              |
| <i>Alepocephalus rostratus</i>                             | $TW(g) = 0.0037 \times (SLcm)^{3.3155}$  | 35  | PSB trawl data       | NE Atlantic                                              |
| <i>Antimora rostrata</i>                                   | $TW(g) = 0.0015 \times (SLcm)^{3.4912}$  | 244 | PSB trawl data       | NE Atlantic                                              |
| <i>Aphanopus carbo</i>                                     | $TW(g) = 0.00003 \times (SLcm)^{3.8474}$ | 15  | PSB trawl data       | NE Atlantic                                              |
| <i>Argentina silus</i>                                     | $TW(g) = 0.0055 \times (SLcm)^{3.2242}$  | 421 | Gordon & Hunter 1994 | NE Atlantic                                              |
| <i>Argentina sphyraena</i>                                 | $TW(g) = 0.0053 \times (TLcm)^{3.053}$   | 157 | Coull et al. 1989    | NE Atlantic,<br>$TL(cm) = 1.1027 \times (SLcm) + 0.2154$ |
| <i>Bathypterois dubius</i><br><i>Bathypterois longipes</i> | $TW(g) = 0.0074 \times (SLcm)^{2.982}$   | 123 | PSB trawl data       | <i>Bathypterois dubius</i> data,<br>NE Atlantic          |
| <i>Bathyraja richardsoni</i>                               | $TW(g) = 0.0081 \times (TLcm)^{2.9441}$  | 3   | PSB trawl data       | NE Atlantic                                              |
| <i>Bathysaurus ferox</i>                                   | $TW(g) = 0.0006 \times (SLcm)^{3.6252}$  | 21  | PSB trawl data       | NE Atlantic                                              |
| <i>Bathysaurus mollis</i>                                  | $TW(g) = 0.0009 \times (SLcm)^{3.5055}$  | 4   | PSB trawl data       | NE Atlantic                                              |

|                                                    |                                           |     |                      |                                                      |
|----------------------------------------------------|-------------------------------------------|-----|----------------------|------------------------------------------------------|
| <i>Bathytroctes microlepis</i>                     | $TW(g) = 0.0156 \times (SLcm)^{2.8664}$   | 17  | PSB trawl data       | NE Atlantic                                          |
| <i>Bathytroctes macrolepis</i>                     | $TW(g) = 0.0032 \times (SLcm)^{3.3948}$   | 11  | PSB trawl data       | NE Atlantic                                          |
| <i>Bathytroctes michaelsarsi</i>                   | $TW(g) = 0.0165 \times (TLcm)^{2.8148}$   | 3   | PSB trawl data       | NE Atlantic                                          |
| <i>Beryx decadactylus</i>                          | $TW(g) = 0.027 \times (FLcm)^{2.9738}$    | NA  | John Gordon          | NE Atlantic                                          |
| <i>Caelorinchus caelorhincus</i>                   | $TW(g) = 0.00219 \times (TLcm)^{3.106}$   | 25  | Borges et al. 2003   | S Portugal<br>$TL(cm)=4.3706 \times (HLcm) + 1.1642$ |
| <i>Caelorinchus labiatus</i>                       | $TW(g) = 0.145 \times (HLcm)^{3.0234}$    | 84  | PSB trawl data       | NE Atlantic                                          |
| <i>Cataetyx laticeps</i><br><i>Cataetyx alleni</i> | $TW(g) = 0.0045 \times (SLcm)^{3.1049}$   | 22  | PSB trawl data       | used <i>Cataetyx laticeps</i> data,<br>NE Atlantic   |
| <i>Centrophorus squamosus</i>                      | $TW(g) = 0.00007* \times (TLcm)^{3.9318}$ | NA  | John Gordon          | NE Atlantic                                          |
| <i>Centroscymnus coelolepis</i>                    | $TW(g) = 0.0043 \times (TLcm)^{3.1204}$   | 227 | Gordon & Hunter 1994 | NE Atlantic                                          |
| <i>Chimaera monstrosa</i>                          | $TW(g) = 0.00014 \times (TLcm)^{3.475}$   | 22  | Borges et al. 2003   | S Portugal                                           |
| <i>Conocara macropterum</i>                        | $TW(g) = 0.0022 \times (SLcm)^{3.3882}$   | 25  | PSB trawl data       | NE Atlantic                                          |
| <i>Conocara murrayi</i>                            | $TW(g) = 0.0022 \times (SLcm)^{3.4581}$   | 23  | PSB trawl data       | NE Atlantic                                          |
| <i>Conocara salmoneum</i>                          | $TW(g) = 0.0025 \times (SLcm)^{3.486}$    | 7   | PSB trawl data       | NE Atlantic                                          |
| <i>Coryphaenoides armatus</i>                      | $TW(g) = 0.2926 \times (HLcm)^{3.4506}$   | 761 | PSB trawl data       | NE Atlantic                                          |
| <i>Coryphaenoides brevibarbis</i>                  | $TW(g) = 0.4336 \times (HLcm)^{2.8262}$   | 69  | PSB trawl data       | NE Atlantic                                          |

|                                                   |                                         |      |                      |                                                                       |
|---------------------------------------------------|-----------------------------------------|------|----------------------|-----------------------------------------------------------------------|
| <i>Coryphaenoides carapinus</i>                   | $TW(g) = 0.1734 \times (HLcm)^{3.6864}$ | 39   | PSB trawl data       | NE Atlantic                                                           |
| <i>Coryphaenoides guentheri</i>                   | $TW(g) = 0.8921 \times (HLcm)^{2.5784}$ | 1023 | PSB trawl data       | NE Atlantic                                                           |
| <i>Coryphaenoides leptolepis</i>                  | $TW(g) = 0.2947 \times (HLcm)^{3.1591}$ | 185  | PSB trawl data       | NE Atlantic                                                           |
| <i>Coryphaenoides mediterraneus</i>               | $TW(g) = 0.4966 \times (HLcm)^{3.0369}$ | 60   | PSB trawl data       | NE Atlantic                                                           |
| <i>Coryphaenoides profundicolus</i>               | $TW(g) = 0.2155 \times (HLcm)^{3.383}$  | 17   | PSB trawl data       | NE Atlantic                                                           |
| <i>Coryphaenoides rupestris</i>                   | $TW(g) = 0.231 \times (HLcm)^{3.2892}$  | 342  | PSB trawl data       | NE Atlantic                                                           |
| <i>Cottunculus thomsonii</i>                      | $TW(g) = 0.0156 \times (SLcm)^{3.0806}$ | 12   | PSB trawl data       | NE Atlantic                                                           |
| <i>Dalatias licha</i>                             | $TW(g) = 0.0008 \times (TLcm)^{3.433}$  | 30   | John Gordon          | NE Atlantic                                                           |
| <i>Deania calcea</i>                              | $TW(g) = 0.0012 \times (TLcm)^{3.2623}$ | 494  | Gordon & Hunter 1994 | NE Atlantic                                                           |
| <i>Dipturus nidarosiensis</i>                     | $TW(g) = 0.0108 \times (DWcm)^{3.079}$  | NA   | Coull et al. 1989    | used <i>Dipturus batis</i> , NE Atlantic,<br>DW (cm) = TL(cm) / 1.424 |
| <i>Echiodon drummondii</i>                        | $TW(g) = 0.00059 \times (TLcm)^3$       | NA   | Pauly et al. 1998    | NE Atlantic                                                           |
| <i>Epigonus telescopus</i>                        | $TW(g) = 0.0111 \times (SLcm)^{3.1601}$ | 10   | PSB trawl data       | NE Atlantic                                                           |
| <i>Etmopterus princeps</i>                        | $TW(g) = 0.0028 \times (TLcm)^{3.1476}$ | 30   | Gordon & Hunter 1994 | NE Atlantic                                                           |
| <i>Etmopterus spinax</i>                          | $TW(g) = 0.0018 \times (TLcm)^{3.2430}$ | 198  | Gordon & Hunter 1994 | NE Atlantic                                                           |
| <i>Gaidropsarus macrophthalmus macrophthalmus</i> | $TW(g) = 0.0041 \times (SLcm)^{3.2879}$ | 4    | PSB trawl data       | NE Atlantic                                                           |

|                                                 |                                          |     |                    |                                                       |
|-------------------------------------------------|------------------------------------------|-----|--------------------|-------------------------------------------------------|
| <i>Gaidropsarus argentatus</i>                  | $TW(g) = 0.0065 \times (SLcm)^{3.279}$   | NA  | John Gordon        | NE Atlantic                                           |
| <i>Galeus melastomus</i>                        | $TW(g) = 0.00166 \times (TLcm)^{3.145}$  | 311 | Borges et al. 2003 | S Portugal                                            |
| <i>Galeus murinus</i>                           | $TW(g) = 0.0048 \times (SLcm)^{3.5928}$  | NA  | John Gordon        | NE Atlantic                                           |
| <i>Glyptocephalus cynoglossus</i>               | $TW(g) = 0.0017 \times (TLcm)^{3.39}$    | 571 | Coull et al. 1989  | NE Atlantic                                           |
| <i>Guttigadus latifrons</i>                     | $TW(g) = 0.0103 \times (SLcm)^{2.8844}$  | 15  | PSB trawl data     | NE used <i>Halargyreus johnsonii</i> ,<br>NE Atlantic |
| <i>Halargyreus johnsonii</i>                    | $TW(g) = 0.0103 \times (SLcm)^{2.8844}$  | 15  | PSB trawl data     | NE Atlantic                                           |
| <i>Halosauropsis macrochir</i>                  | $TW(g) = 0.0138 \times (GPLcm)^{3.033}$  | 34  | PSB trawl data     | NE Atlantic                                           |
| <i>Halosaurus johnsonianus</i>                  | $TW(g) = 0.0138 \times (GPLcm)^{3.033}$  | 34  | PSB trawl data     | used <i>Halosauropsis macrochir</i> ,<br>NE Atlantic  |
| <i>Harriotta raleighana</i>                     | $TW(g) = 0.0007 \times (TLcm)^{3.38}$    | NA  | John Gordon        | NE Atlantic                                           |
| <i>Helicolenus dactylopterus dactylopterus</i>  | $TW(g) = 0.0128 \times (SLcm)^{3.2604}$  | 6   | PSB trawl data     | NE Atlantic                                           |
| <i>Histiobranchus bathybius</i>                 | $TW(g) = 0.0002 \times (TLcm)^{3.4447}$  | 55  | PSB trawl data     | NE Atlantic                                           |
| <i>Hoplostethus atlanticus</i>                  | $TW(g) = 0.00735 \times (SLcm)^{2.7759}$ | 10  | PSB trawl data     | NE Atlantic                                           |
| <i>Hoplostethus mediterraneus mediterraneus</i> | $TW(g) = 0.0417 \times (SLcm)^{2.9121}$  | 10  | PSB trawl data     | NE Atlantic                                           |
| <i>Hydrolagus affinis</i>                       | $TW(g) = 0.0043 \times (TLcm)^{3.08}$    | NA  | John Gordon        | NE Atlantic                                           |

|                                   |                                           |     |                      |                                                     |
|-----------------------------------|-------------------------------------------|-----|----------------------|-----------------------------------------------------|
| <i>Hydrolagus mirabilis</i>       | $TW(g) = 0.0152 \times (TLcm)^{2.2802}$   | 10  | PSB trawl data       | NE Atlantic                                         |
| <i>Ilyophis arx</i>               | $TW(g) = 0.000077 \times (SLcm)^{3.6349}$ | 297 | Gordon & Duncan 1987 | used <i>Synaphobranchus kaupii</i> ,<br>NE Atlantic |
| <i>Ilyophis blachei</i>           | $TW(g) = 0.000077 \times (SLcm)^{3.6349}$ | 297 | Gordon & Duncan 1987 | used <i>Synaphobranchus kaupii</i> ,<br>NE Atlantic |
| <i>Ilyophis brunneus</i>          | $TW(g) = 0.000077 \times (SLcm)^{3.6349}$ | 297 | Gordon & Duncan 1987 | used <i>Synaphobranchus kaupii</i> ,<br>NE Atlantic |
| <i>Lepidion eques</i>             | $TW(g) = 0.0026 \times (SLcm)^{3.2909}$   | 657 | PSB trawl data       | NE Atlantic                                         |
| <i>Lepidorhombus boscii</i>       | $TW(g) = 0.00349 \times (TLcm)^{3.219}$   | 7   | Borges et al. 2003   | S Portugal                                          |
| <i>Lepidorhombus whiffiagonis</i> | $TW(g) = 0.0008 \times (SLcm)^{3.1109}$   | 31  | John Gordon          | NE Atlantic                                         |
| <i>Leucoraja circularis</i>       | $TW(g) = 0.0024 \times (TLcm)^{3.233}$    | NA  | Dorel 1986           | NE Atlantic                                         |
| <i>Lophius piscatorius</i>        | $TW(g) = 0.0063 \times (TLcm)^{3.284}$    | 47  | Borges et al. 2003   | S Portugal                                          |
| <i>Lycodes terraenovae</i>        | $TW(g) = 0.00005 \times (TLcm)^{4.1968}$  | 4   | John Gordon          | NE Atlantic                                         |
| <i>Merluccius merluccius</i>      | $TW(g) = 0.0047 \times (SLcm)^{3.099}$    | NA  | John Gordon          | NE Atlantic                                         |
| <i>Microchirus variegatus</i>     | $TW(g) = 0.0089 \times (TLcm)^{3.0790}$   | 5   | Coull et al. 1989    | NE Atlantic                                         |
| <i>Molva dypterygia</i>           | $TW(g) = 0.0015 \times (TLcm)^{3.228}$    | 240 | Gordon & Hunter 1994 | NE Atlantic                                         |
| <i>Molva macrophthalma</i>        | $TW(g) = 0.0009 \times (TLcm)^{3.24}$     | NA  | John Gordon          | NE Atlantic                                         |
| <i>Mora moro</i>                  | $TW(g) = 0.0013 \times (SLcm)^{3.6134}$   | 20  | PSB trawl data       | NE Atlantic                                         |

|                                                           |                                                 |     |                      |                                                   |
|-----------------------------------------------------------|-------------------------------------------------|-----|----------------------|---------------------------------------------------|
| <i>Narctes stomias</i>                                    | $TW(g) = 0.0072 \times (SLcm)^{3.0679}$         | 27  | PSB trawl data       | NE Atlantic                                       |
| <i>Nezumia aequalis</i>                                   | $TW(g) = 0.8878 \times (HLcm)^{2.7835}$         | 193 | PSB trawl data       | NE Atlantic                                       |
| <i>Notacanthus bonaparte</i>                              | $TW(g) = 5E-5 \times (TLcm)^{3.9591}$           | 28  | PSB trawl data       | NE Atlantic                                       |
| <i>Notacanthus chemnitzii</i>                             | $\ln(Wg) = 2.910 * \ln \times (GPLcm)^{-2.979}$ | 97  | Coggan et al. 1998   | NE Atlantic                                       |
| <i>Pachycara crassiceps</i><br><i>Pachycara bulbiceps</i> | $TW(g) = 0.0004 \times (TLcm)^{3.673}$          | 3   | PSB trawl data       | used <i>Pachycara crassiceps</i> ,<br>NE Atlantic |
| <i>Paraliparis hystrix</i>                                | $TW(g) = 0.0011 \times (SLcm)^{3.7392}$         | 12  | John Gordon          | NE Atlantic                                       |
| <i>Phycis blennoides</i>                                  | $TW(g) = 0.012 \times (SLcm)^{2.9543}$          | 8   | PSB trawl data       | NE Atlantic                                       |
| <i>Polyacanthonotus challengerii</i>                      | $TW(g) = 0.0051 \times (GPLcm)^{3.7161}$        | 5   | PSB trawl data       | NE Atlantic                                       |
| <i>Polyacanthonotus rissoanus</i>                         | $TW(g) = 0.0005 \times (TLcm)^{3.1395}$         | 77  | PSB trawl data       | NE Atlantic                                       |
| <i>Pseudonezumia flagellicauda</i>                        | $TW(g) = 0.8878 \times (HLcm)^{2.7835}$         | 193 | PSB trawl data       | used <i>Nezumia aequalis</i> , NE Atlantic        |
| <i>Rajella bigelowi</i>                                   | $TW(g) = 0.0154 \times (TLcm)^{2.6517}$         | 5   | PSB trawl data       | NE Atlantic                                       |
| <i>Rajella fyllae</i>                                     | $TW(g) = 0.02 \times (TLcm)^{2.5963}$           | 3   | PSB trawl data       | NE Atlantic                                       |
| <i>Rinoctes nasutus</i>                                   | $TW(g) = 0.0137 \times (SLcm)^{2.8874}$         | 10  | PSB trawl data       | NE Atlantic                                       |
| <i>Rouleina attrita</i>                                   | $TW(g) = 0.0137 \times (SLcm)^{2.8874}$         | 22  | John Gordon          | NE Atlantic                                       |
| <i>Scymnodon ringens</i>                                  | $TW(g) = 0.0043 \times (TLcm)^{3.1286}$         | 62  | Gordon & Hunter 1994 | NE Atlantic                                       |

|                                          |                                         |      |                |                                                     |
|------------------------------------------|-----------------------------------------|------|----------------|-----------------------------------------------------|
| <i>Spectrunculus grandis</i>             | $TW(g) = 0.0083 \times (SLcm)^{2.9416}$ | 101  | PSB trawl data | NE Atlantic                                         |
| <i>Synaphobranchus kaupii</i>            | $TW(g) = 9E-5 \times (TLcm)^{3.5584}$   | 1532 | PSB trawl data | NE Atlantic                                         |
| <i>Trachyrincus murrayi</i>              | $TW(g) = 0.1503 \times (HLcm)^{2.9995}$ | 44   | PSB trawl data | NE Atlantic                                         |
| <i>Trachyrincus scabrus</i>              | $TW(g) = 0.04444 \times (HLcm)^{3.525}$ | 10   | PSB trawl data | NE Atlantic                                         |
| <i>Trachyscorpia cristulata echinata</i> | $TW(g) = 0.0031 \times (SLcm)^{3.6574}$ | 4    | PSB trawl data | NE Atlantic                                         |
| <i>Venefica proboscidea</i>              | $TW(g) = 0.0083 \times (SLcm)^{2.9416}$ | 1532 | PSB trawl data | used <i>Synaphobranchus kaupii</i> ,<br>NE Atlantic |

Borges, T.C., Olim, S. and Erzini, K.: Weight-length relationships for fish species discarded in commercial fisheries of the Algarve (southern Portugal), J. Appl. Ichthyol., 19, 394-396.

Coggan, R.A., Gorodn, J.D.M. and Merrett, N.R.: Abundance, distribution, reproduction and diet of notacanthid fishes from the north-east Atlantic, J. Fish Biol., 52, 1038-1057, 1998.

Coull, K.A., Jermyn, A.S., Newton, A.W., Henderson, G.I. and Hall, W.B.: Length/weight relationships for 88 species of fish encountered in the north east Atlantic, Scottish Fisheries Research Report, 43, 1-81, 1989.

Dorel, D.: Poissons de l'Atlantique nord-est relations taille-poids. Institut Francais de Recherche pour l'Exploitation de la Mer. Nantes, France. 165 pp, 1986.

Gordon, J.D.M. and Duncan, J.A.R.: Deep-sea bottom-living fishes at two repeat stations at 2200 and 2900 m in the Rockall Trough, northeastern Atlantic Ocean, Mar. Biol., 96, 309-325, 1987

Gordon, J.D.M. and Hunter, J.E.: Study of deep-water fish stocks to the west of Scotland, Final Report, Scottish Association for Marine Science, 1994.

Data referenced as John Gordon, is unpublished data collected by J.D.M. Gordon at the Scottish Association for Marine Science.
